# Supplementary material for: Testicular biopsies microarray analysis reveals circRNAs are involved in the pathogenesis of non-obstructive azoospermia
Source: publisher site journal article supplement (doi:10.18632/aging.102765), 2020-02-06
Supplement: Supplementary file [file aging-v12i3-102765-supplementary-material-SD1.pdf]

**SUPPLEMENTARY FIGURE**

**A**

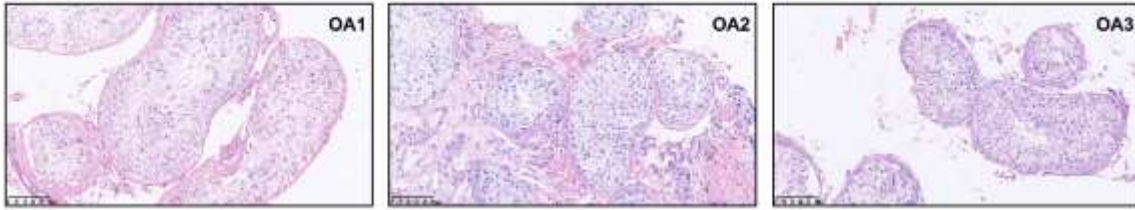

**B**

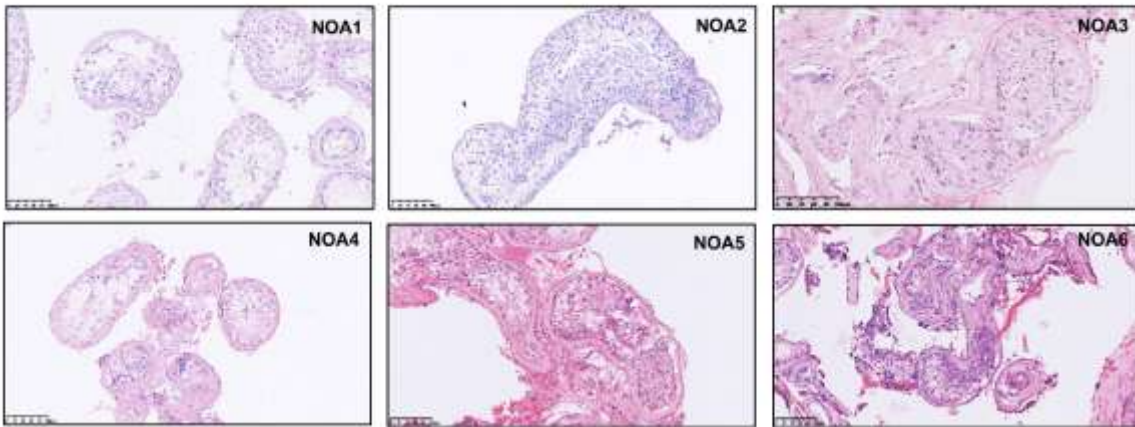

**Supplementary Figure 1. Histological pathological examinations of testis samples from 3 OA and 10 NOA patients. OA: obstructive azoospermia; NOA: non-obstructive azoospermia. Scale bar=100  $\mu$ m.**
